# Supplementary material
Source: PubMed Central journal article supplement (PMC7513386)
Supplement: MD-011-D0MD00150C-s001.pdf [file MD-011-D0MD00150C-s001.pdf]

**Novel 1,3,4-thiadiazole compounds as potential MAO-A inhibitors-Design, synthesis, biological evaluation and molecular modelling**

**Begüm Nurpelin Sağlık<sup>a,c</sup>, Betül Kaya Çavuşoğlu<sup>b,c\*</sup>, Ulviye Acar Çevik<sup>a,c</sup>, Derya Osmaniye<sup>a,c</sup>, Serkan Levent<sup>a,c</sup>, Yusuf Özkay<sup>a,c</sup>, Zafer Asım Kaplancıklı<sup>a</sup>**

<sup>a</sup> Department of Pharmaceutical Chemistry, Faculty of Pharmacy, Anadolu University, Eskişehir, Turkey

<sup>b</sup> Department of Pharmaceutical Chemistry, Faculty of Pharmacy, Bulent Ecevit University, Zonguldak, Turkey

<sup>c</sup> Doping and Narcotic Compounds Analysis Laboratory, Faculty of Pharmacy, Anadolu University, Eskişehir, Turkey

\*Corresponding author.

E-mail address: betul.kcavusoglu@beun.edu.tr

Tel: +90 (372) 261 31 54 Fax: +90 (372) 261 02 10.

Address: Bulent Ecevit University, Faculty of Pharmacy, Department of Pharmaceutical Chemistry, 67600, Zonguldak, Turkey.

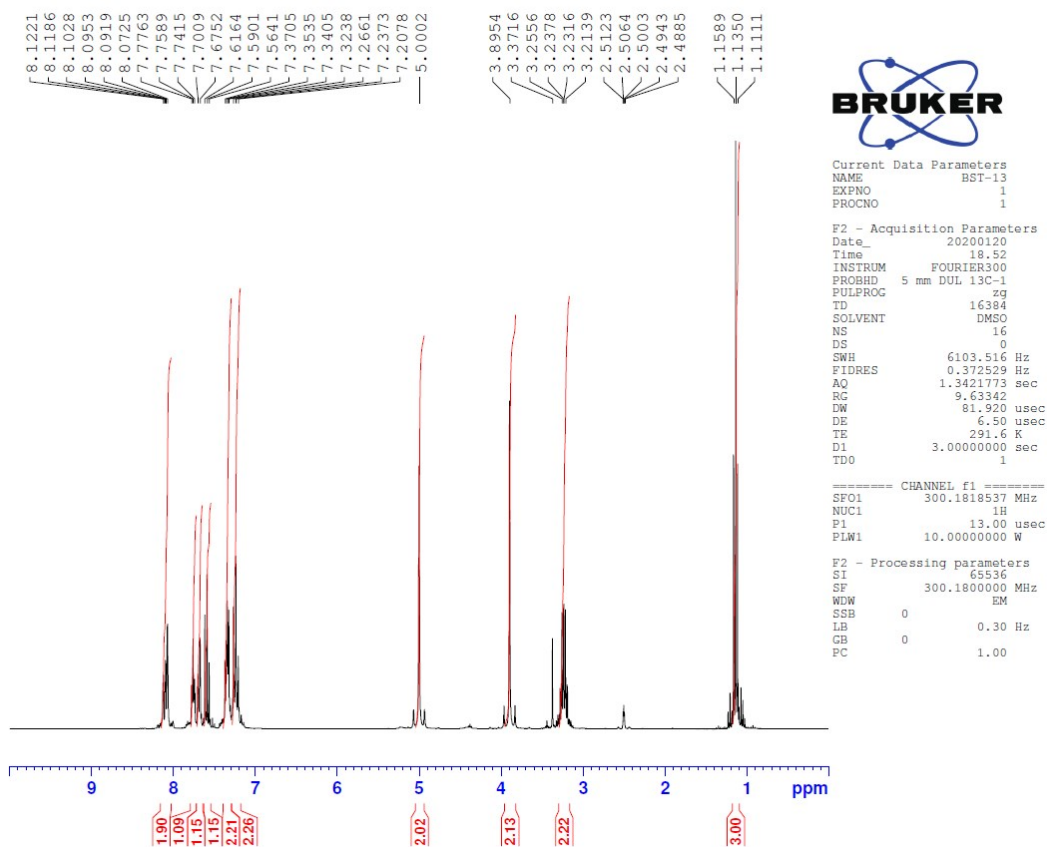

Figure S1. <sup>1</sup>H NMR spectrum of compound 6a.

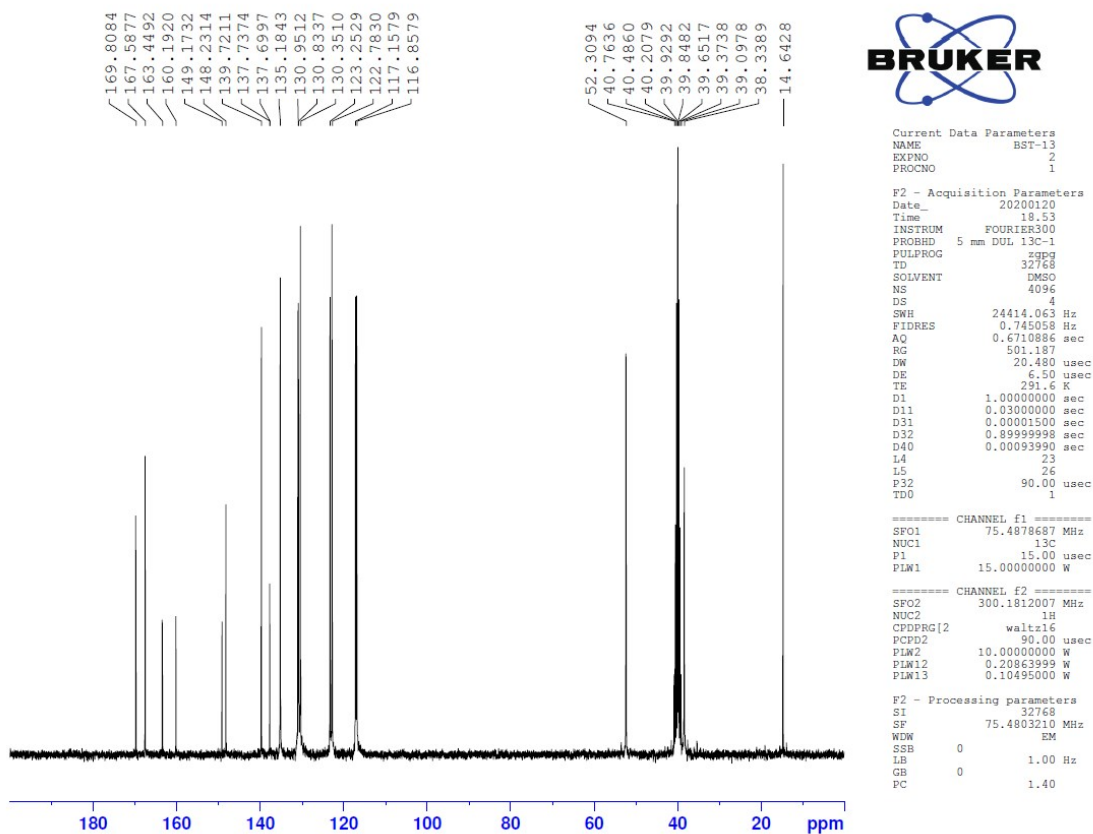

Figure S2. <sup>13</sup>C NMR spectrum of compound 6a.

Data File: C:\LabSolutions\Data\Analiz\uacl\BST-13\_6.lcd

| Elmt | Val. | Min | Max | Use Adduct |
|------|------|-----|-----|------|------|-----|-----|------|------|-----|-----|------|------|-----|-----|------------|
| H    | 1    | 6   | 30  | O    | 2    | 3   | 4   | S    | 2    | 2   | 3   | Ru   | 2    | 0   | 0   | H          |
| C    | 4    | 8   | 30  | F    | 1    | 0   | 1   | Cl   | 1    | 0   | 0   | Pd   | 2    | 0   | 0   |            |
| N    | 3    | 4   | 5   | P    | 3    | 0   | 0   | Br   | 1    | 0   | 0   | I    | 3    | 0   | 0   |            |

Error Margin (ppm): 5  
 DBE Range: 7.0 - 15.0  
 Electron Ions: both  
 HC Ratio: unlimited  
 Apply N Rule: yes  
 Use MSn Info: yes  
 Max Isotopes: 3  
 Isotope RI (%): 1.00  
 MSn Iso RI (%): 10.00  
 MSn Logic Mode: AND  
 Isotope Res: 9000  
 Max Results: 100

Event#: 1 MS(E+) Ret. Time : 2.587 -> 3.040 Scan#: 389 -> 457

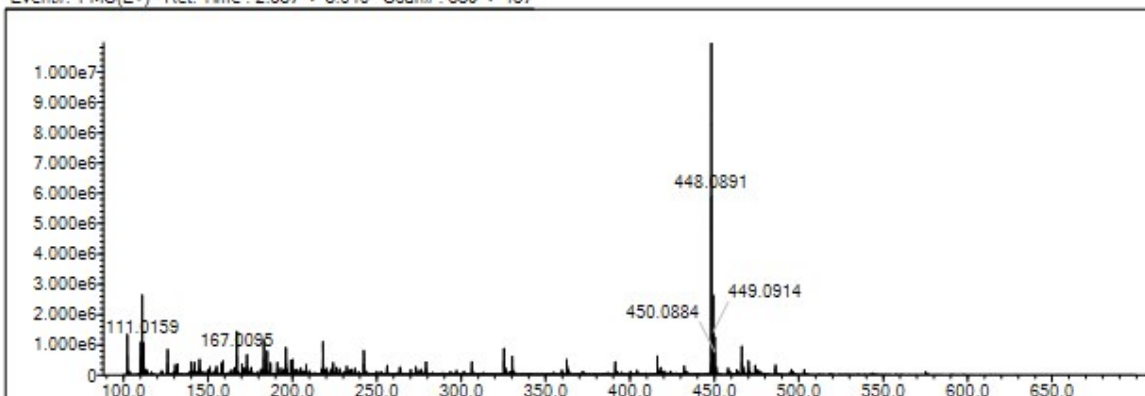

Measured region for 448.0891 m/z

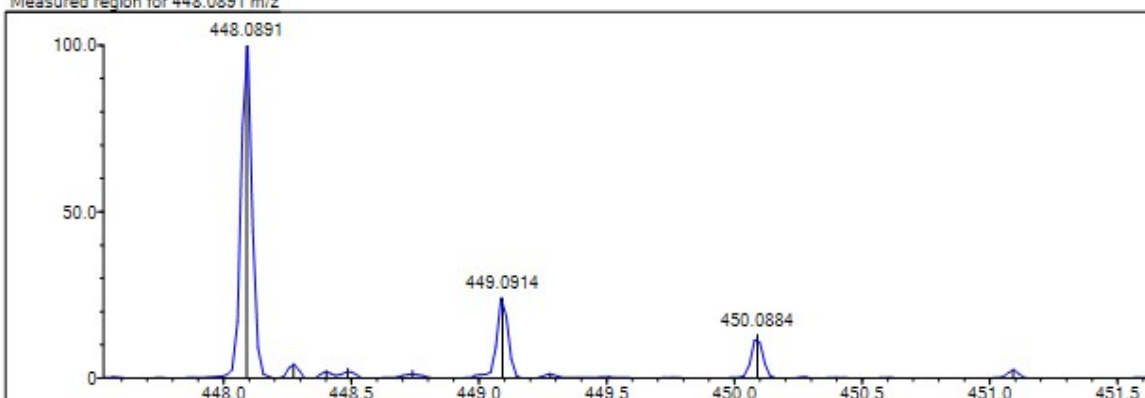

C19 H18 N5 O3 F S2 [M+H]+ : Predicted region for 448.0908 m/z

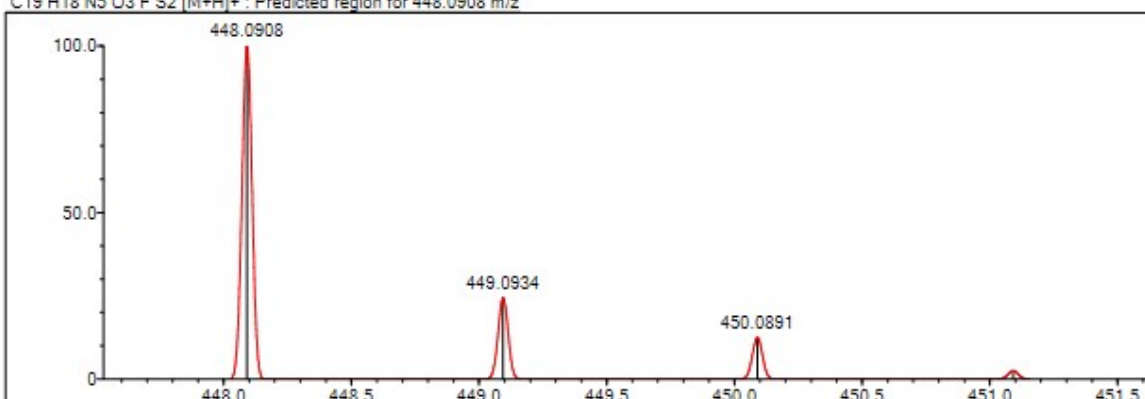

| Rank | Score | Formula (M)        | Ion                | Meas. m/z | Pred. m/z | Df. (mDa) | Df. (ppm) | Iso   | DBE  |
|------|-------|--------------------|--------------------|-----------|-----------|-----------|-----------|-------|------|
| 1    | 92.48 | C19 H18 N5 O3 F S2 | [M+H] <sup>+</sup> | 448.0891  | 448.0908  | -1.7      | -3.79     | 99.42 | 13.0 |

Figure S3. Mass spectrum of compound 6a.

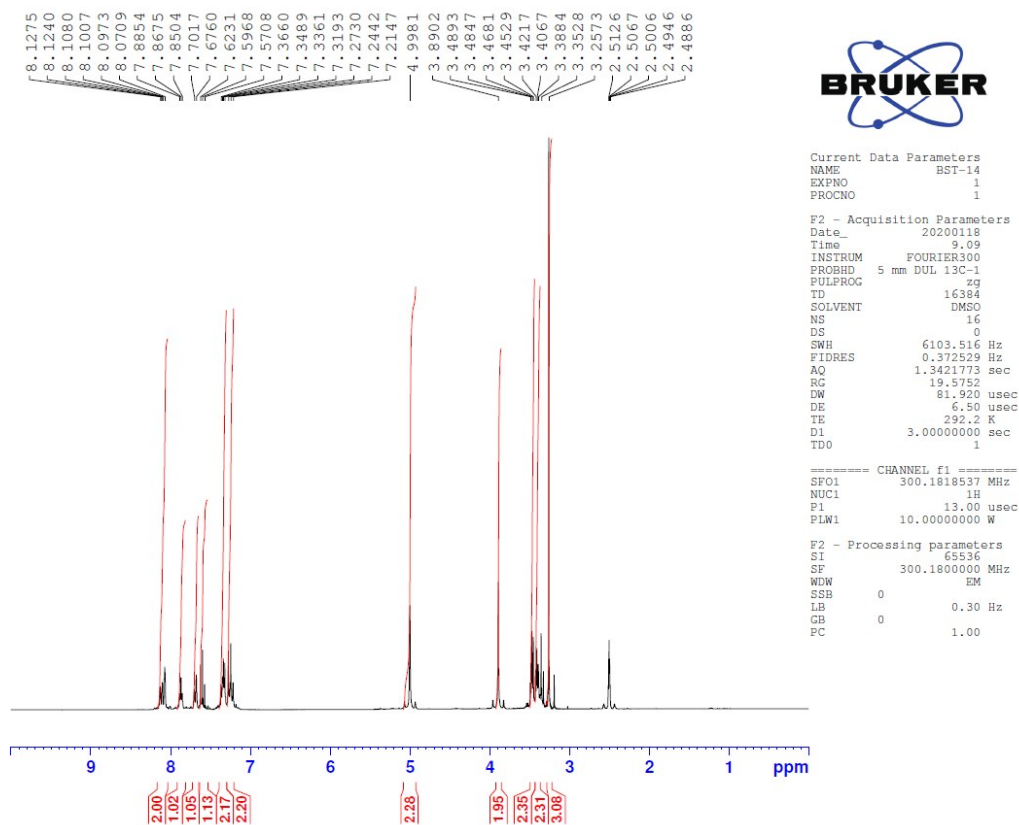

Figure S4.  $^1\text{H}$  NMR spectrum of compound **6b**.

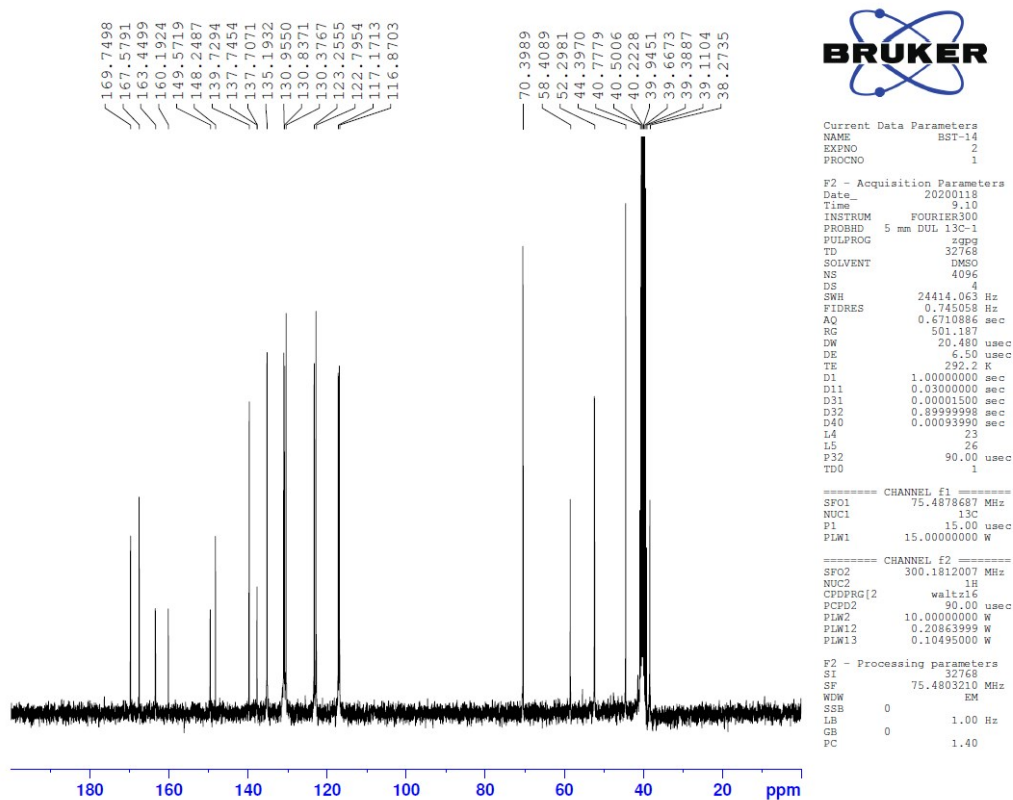

Figure S5.  $^{13}\text{C}$  NMR spectrum of compound **6b**.

Data File: C:\LabSolutions\Data\Analiz\uaoc\BST-14\_7.lcd

| Elmt | Val. | Min | Max | Use Adduct |
|------|------|-----|-----|------|------|-----|-----|------|------|-----|-----|------|------|-----|-----|------------|
| H    | 1    | 6   | 30  | O    | 2    | 3   | 4   | S    | 2    | 2   | 3   | Ru   | 2    | 0   | 0   | H          |
| C    | 4    | 8   | 30  | F    | 1    | 0   | 1   | Cl   | 1    | 0   | 0   | Pd   | 2    | 0   | 0   |            |
| N    | 3    | 4   | 5   | P    | 3    | 0   | 0   | Br   | 1    | 0   | 0   | I    | 3    | 0   | 0   |            |
|      |      |     |     |      |      |     |     |      |      |     |     |      |      |     |     |            |

Error Margin (ppm): 5  
 HC Ratio: unlimited  
 Max Isotopes: 3  
 MSn Iso RI (%): 10.00

DBE Range: 7.0 - 15.0  
 Apply N Rule: yes  
 Isotope RI (%): 1.00  
 MSn Logic Mode: AND

Electron Ions: both  
 Use MSn Info: yes  
 Isotope Res: 9000  
 Max Results: 100

Event#: 1 MS(E+) Ret. Time: 2.320 -> 2.907 Scan#: 349 -> 437

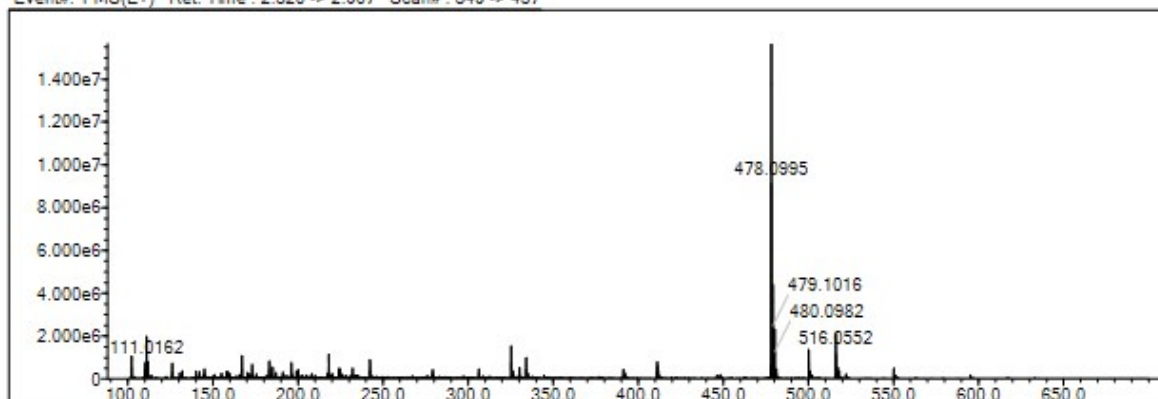

Measured region for 478.0995 m/z

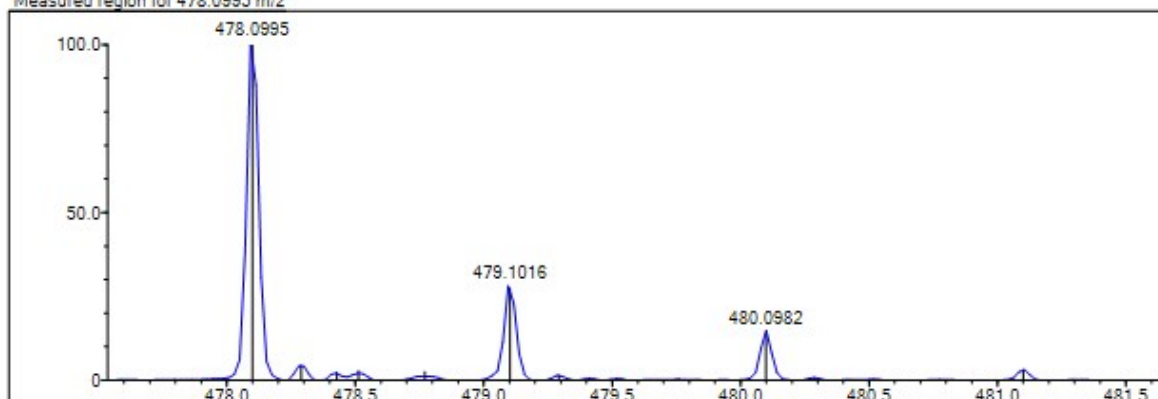

C20 H20 N5 O4 F S2 [M+H]+ : Predicted region for 478.1014 m/z

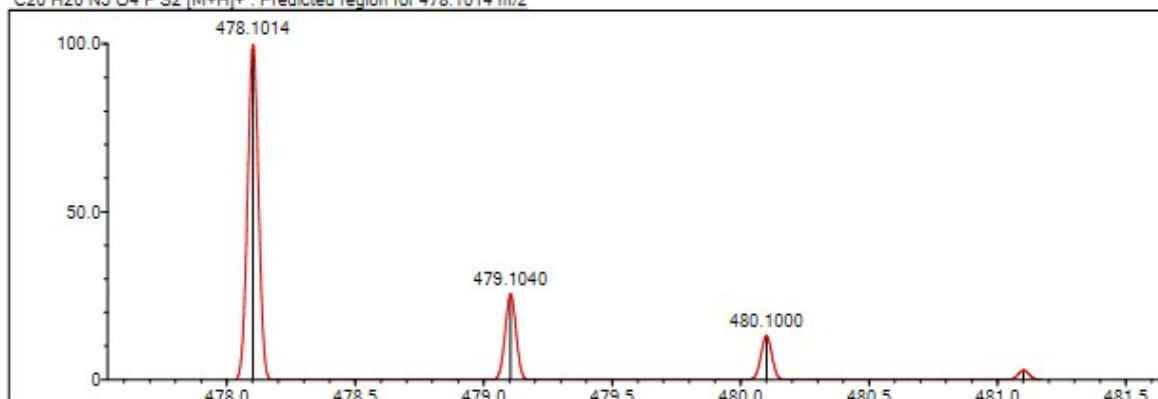

| Rank | Score | Formula (M)        | Ion    | Meas. m/z | Pred. m/z | Df. (mDa) | Df. (ppm) | Iso   | DBE  |
|------|-------|--------------------|--------|-----------|-----------|-----------|-----------|-------|------|
| 1    | 85.52 | C20 H20 N5 O4 F S2 | [M+H]+ | 478.0995  | 478.1014  | -1.9      | -3.97     | 92.38 | 13.0 |

Figure S6. Mass spectrum of compound 6b.

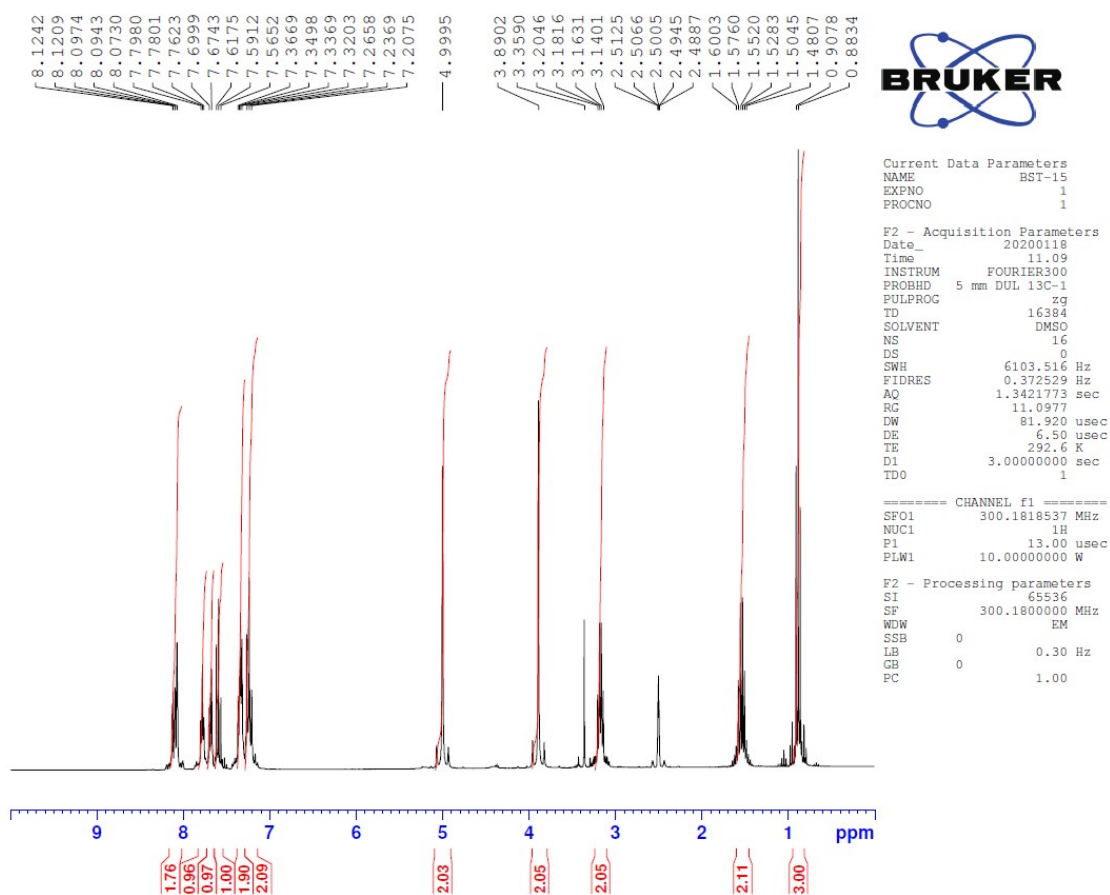

Figure S7. <sup>1</sup>H NMR spectrum of compound 6c.

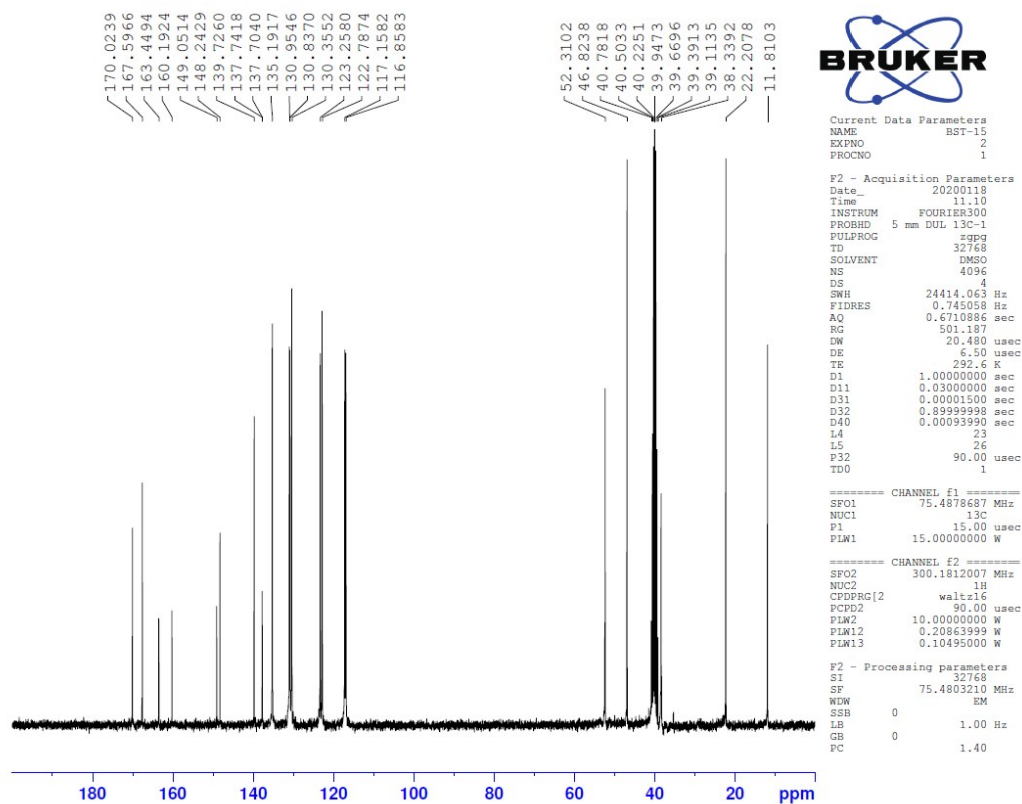

Figure S8. <sup>13</sup>C NMR spectrum of compound 6c.

Data File: C:\LabSolutions\Data\Analiz\luc\BST-15\_8.lcd

| Elmt | Val. | Min | Max | Use Adduct |
|------|------|-----|-----|------|------|-----|-----|------|------|-----|-----|------|------|-----|-----|------------|
| H    | 1    | 6   | 30  | O    | 2    | 3   | 4   | S    | 2    | 2   | 3   | Ru   | 2    | 0   | 0   | H          |
| C    | 4    | 8   | 30  | F    | 1    | 0   | 1   | Cl   | 1    | 0   | 0   | Pd   | 2    | 0   | 0   |            |
| N    | 3    | 4   | 5   | P    | 3    | 0   | 0   | Br   | 1    | 0   | 0   | I    | 3    | 0   | 0   |            |

Error Margin (ppm): 5  
 HC Ratio: unlimited  
 Max Isotopes: 3  
 MSn Iso RI (%): 10.00

DBE Range: 7.0 - 15.0  
 Apply N Rule: yes  
 Isotope RI (%): 1.00  
 MSn Logic Mode: AND

Electron Ions: both  
 Use MSn Info: yes  
 Isotope Res: 9000  
 Max Results: 100

Event#: 1 MS(E+) Ret. Time : 2.760 -&gt; 3.240 Scan#: 415 -&gt; 487

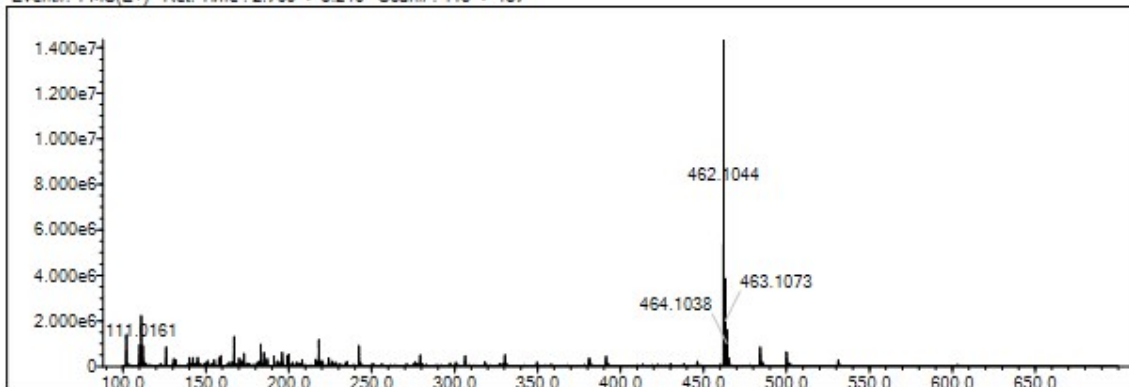

Measured region for 462.1044 m/z

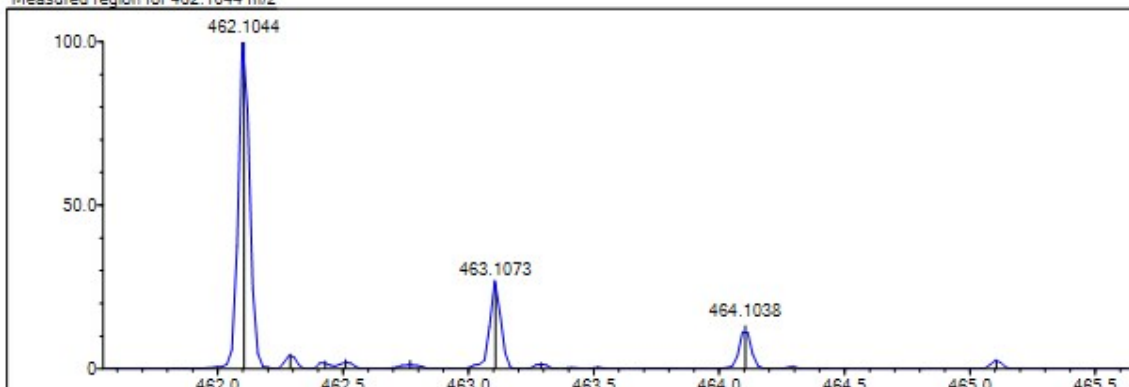C20 H20 N5 O3 F S2 [M+H]<sup>+</sup> : Predicted region for 462.1064 m/z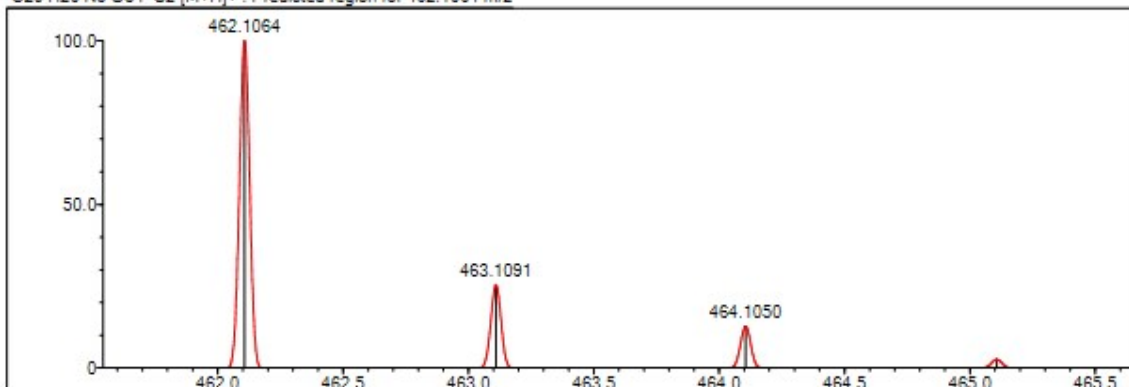

| Rank | Score | Formula (M)        | Ion                | Meas. m/z | Pred. m/z | Df. (mDa) | Df. (ppm) | Iso   | DBE  |
|------|-------|--------------------|--------------------|-----------|-----------|-----------|-----------|-------|------|
| 1    | 75.98 | C20 H20 N5 O3 F S2 | [M+H] <sup>+</sup> | 462.1044  | 462.1064  | -2.0      | -4.33     | 82.88 | 13.0 |

Figure S9. Mass spectrum of compound 6c.

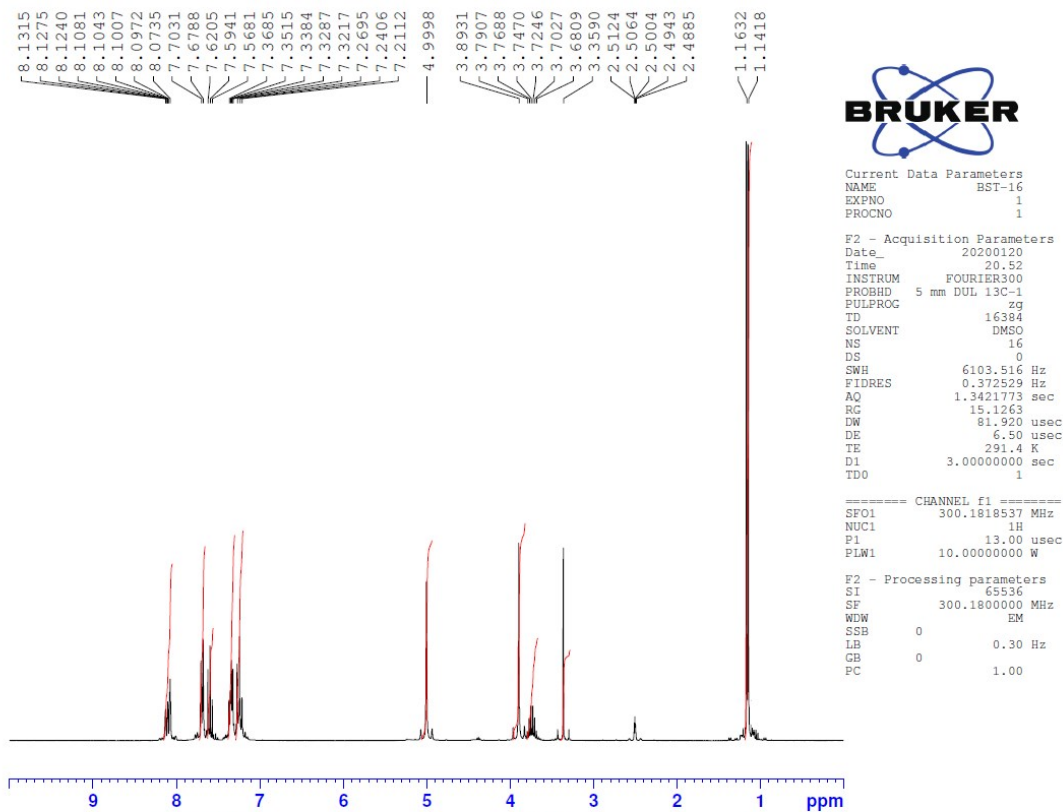

Figure S10. <sup>1</sup>H NMR spectrum of compound 6d.

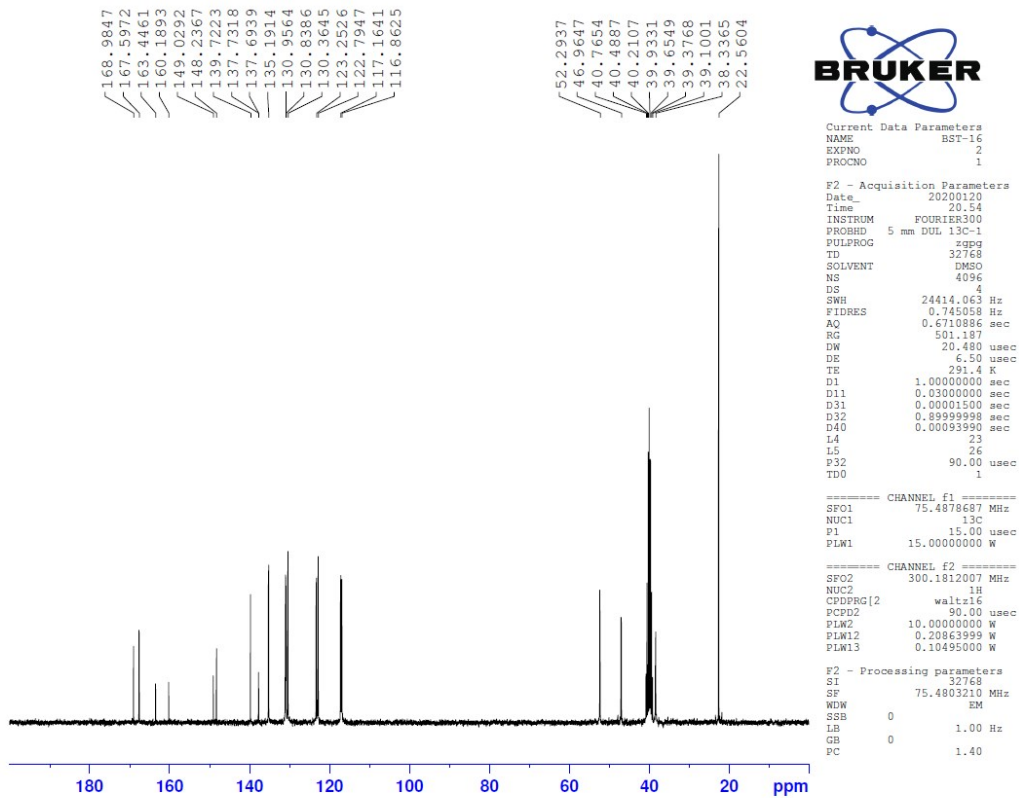

Figure S11. <sup>13</sup>C NMR spectrum of compound 6d.



Data File: C:\LabSolutions\Data\Analiz\luc\BST-16\_9.lcd

| Elmt | Val. | Min | Max | Use Adduct |
|------|------|-----|-----|------|------|-----|-----|------|------|-----|-----|------|------|-----|-----|------------|
| H    | 1    | 6   | 30  | O    | 2    | 3   | 4   | S    | 2    | 2   | 3   | Ru   | 2    | 0   | 0   | H          |
| C    | 4    | 8   | 30  | F    | 1    | 0   | 1   | Cl   | 1    | 0   | 0   | Pd   | 2    | 0   | 0   |            |
| N    | 3    | 4   | 5   | P    | 3    | 0   | 0   | Br   | 1    | 0   | 0   | I    | 3    | 0   | 0   |            |

Error Margin (ppm): 5  
 HC Ratio: unlimited  
 Max Isotopes: 3  
 MSn Iso RI (%): 10.00

DBE Range: 7.0 - 15.0  
 Apply N Rule: yes  
 Isotope RI (%): 1.00  
 MSn Logic Mode: AND

Electron Ions: both  
 Use MSn Info: yes  
 Isotope Res: 9000  
 Max Results: 100

Event#: 1 MS(E+) Ret. Time : 2.653 -&gt; 3.147 Scan#: 399 -&gt; 473

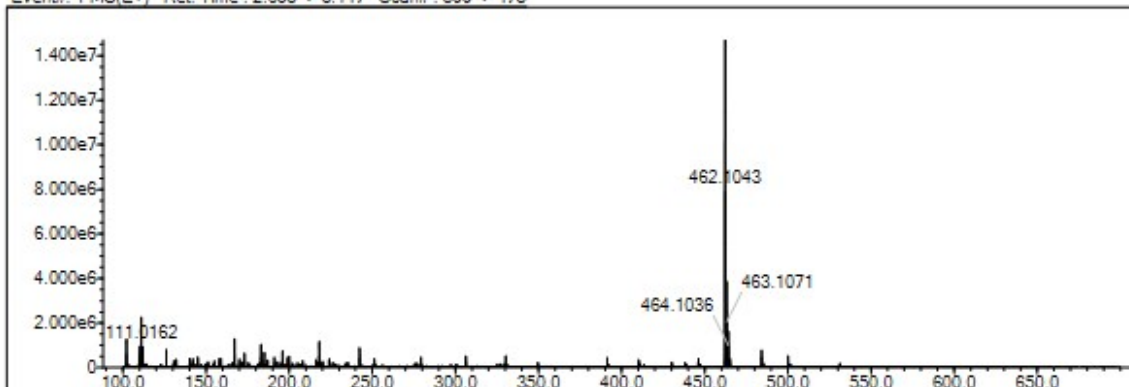

Measured region for 462.1043 m/z

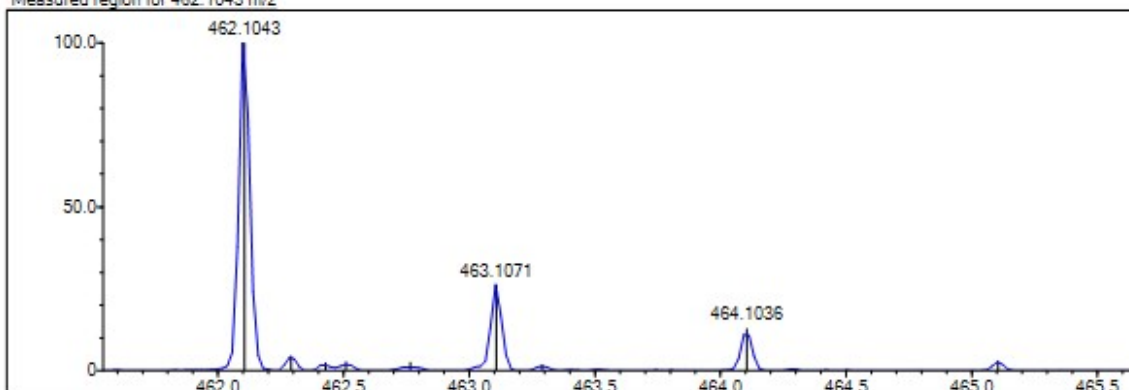C20 H20 N5 O3 F S2 [M+H]<sup>+</sup> : Predicted region for 462.1064 m/z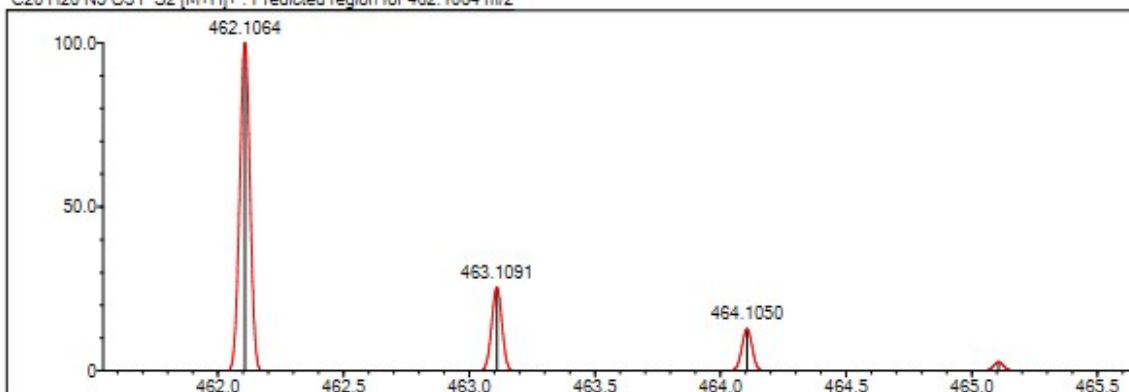

| Rank | Score | Formula (M)                                                                    | Ion                | Meas. m/z | Pred. m/z | Df. (mDa) | Df. (ppm) | Iso   | DBE  |
|------|-------|--------------------------------------------------------------------------------|--------------------|-----------|-----------|-----------|-----------|-------|------|
| 1    | 74.37 | C <sub>20</sub> H <sub>20</sub> N <sub>5</sub> O <sub>3</sub> F S <sub>2</sub> | [M+H] <sup>+</sup> | 462.1043  | 462.1064  | -2.1      | -4.54     | 81.59 | 13.0 |

Figure S12. Mass spectrum of compound 6d.

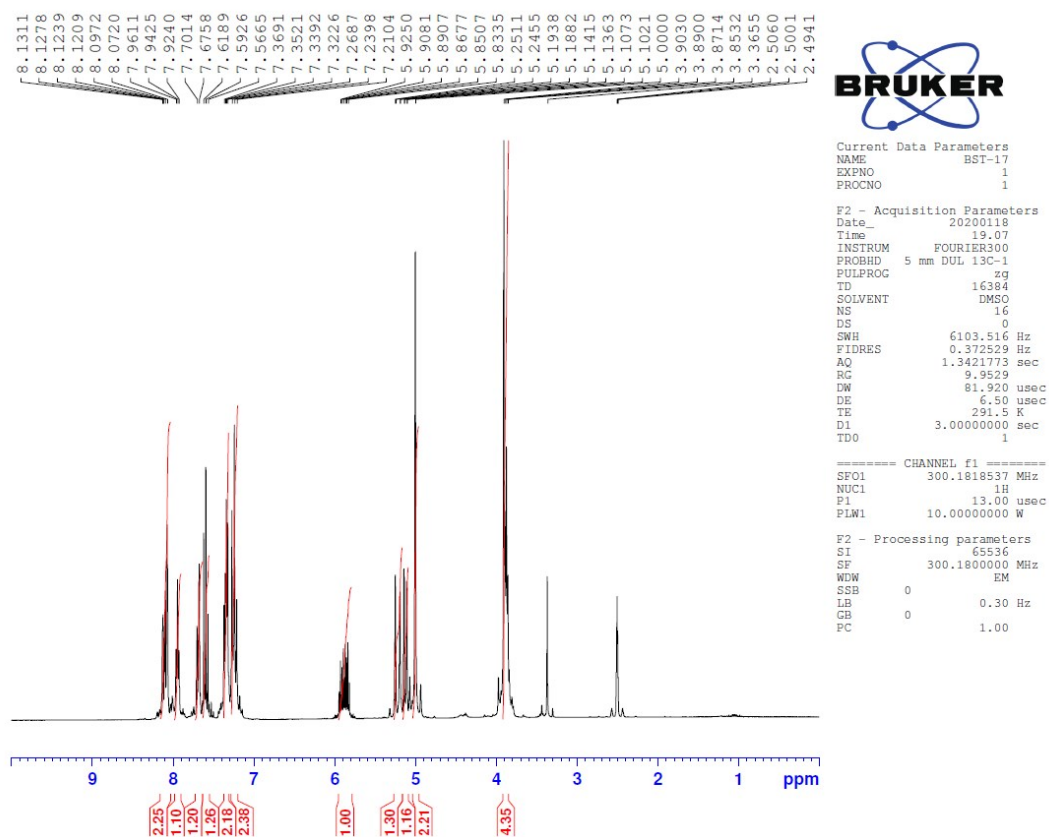

Figure S13. <sup>1</sup>H NMR spectrum of compound 6e.

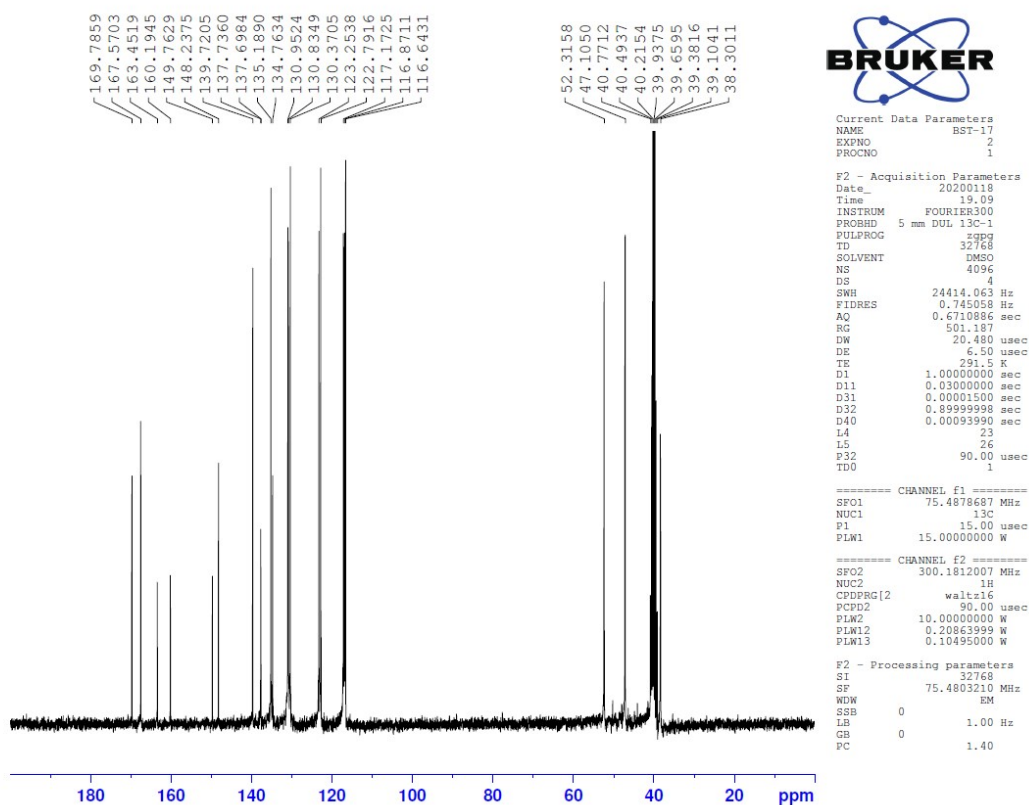

Figure S14. <sup>13</sup>C NMR spectrum of compound 6e.

Data File: C:\LabSolutions\Data\Analiz\uacl\BST-17\_10.lcd

| Elmt | Val. | Min | Max | Use Adduct |
|------|------|-----|-----|------|------|-----|-----|------|------|-----|-----|------|------|-----|-----|------------|
| H    | 1    | 6   | 30  | O    | 2    | 3   | 4   | S    | 2    | 2   | 3   | Ru   | 2    | 0   | 0   | H          |
| C    | 4    | 8   | 30  | F    | 1    | 0   | 1   | Cl   | 1    | 0   | 0   | Pd   | 2    | 0   | 0   |            |
| N    | 3    | 4   | 5   | P    | 3    | 0   | 0   | Br   | 1    | 0   | 0   | I    | 3    | 0   | 0   |            |

Error Margin (ppm): 5  
 HC Ratio: unlimited  
 Max Isotopes: 3  
 MSn Iso RI (%): 10.00

DBE Range: 7.0 - 16.0  
 Apply N Rule: no  
 Isotope RI (%): 1.00  
 MSn Logic Mode: AND

Electron Ions: both  
 Use MSn Info: yes  
 Isotope Res: 9000  
 Max Results: 100

Event#: 1 MS(E+) Ret. Time: 3.507 -> 3.787 Scan#: 527 -> 569

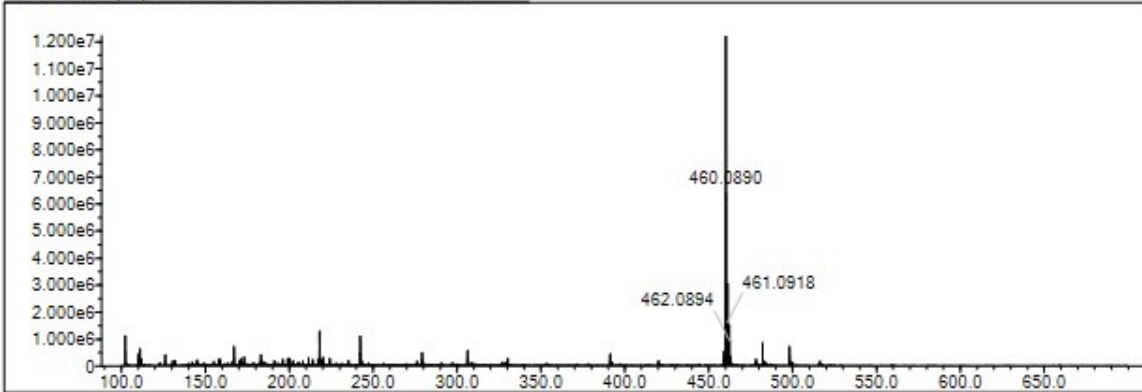

Measured region for 460.0890 m/z

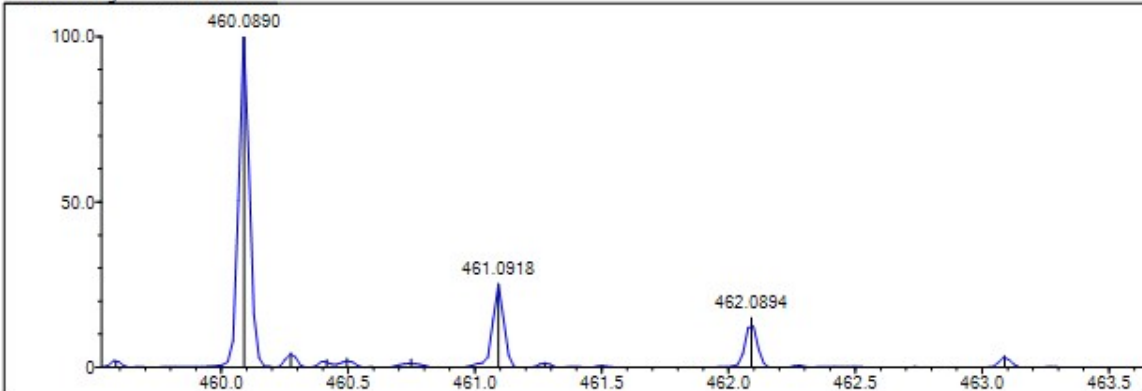

C20 H18 N5 O3 F S2 [M+H]+ : Predicted region for 460.0908 m/z

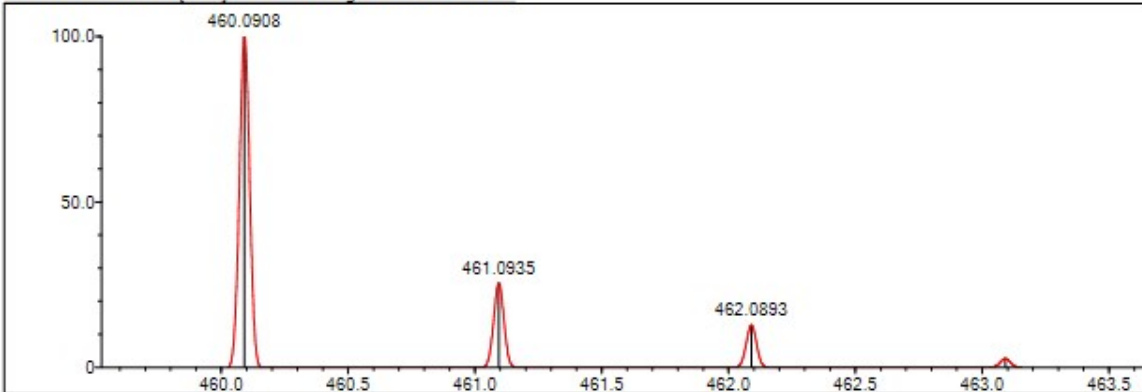

| Rank | Score | Formula (M)        | Ion    | Meas. m/z | Pred. m/z | Df. (mDa) | Df. (ppm) | Iso   | DBE  |
|------|-------|--------------------|--------|-----------|-----------|-----------|-----------|-------|------|
| 1    | 81.38 | C20 H18 N5 O3 F S2 | [M+H]+ | 460.0890  | 460.0908  | -1.8      | -3.91     | 87.76 | 14.0 |

Figure S15. Mass spectrum of compound 6e.

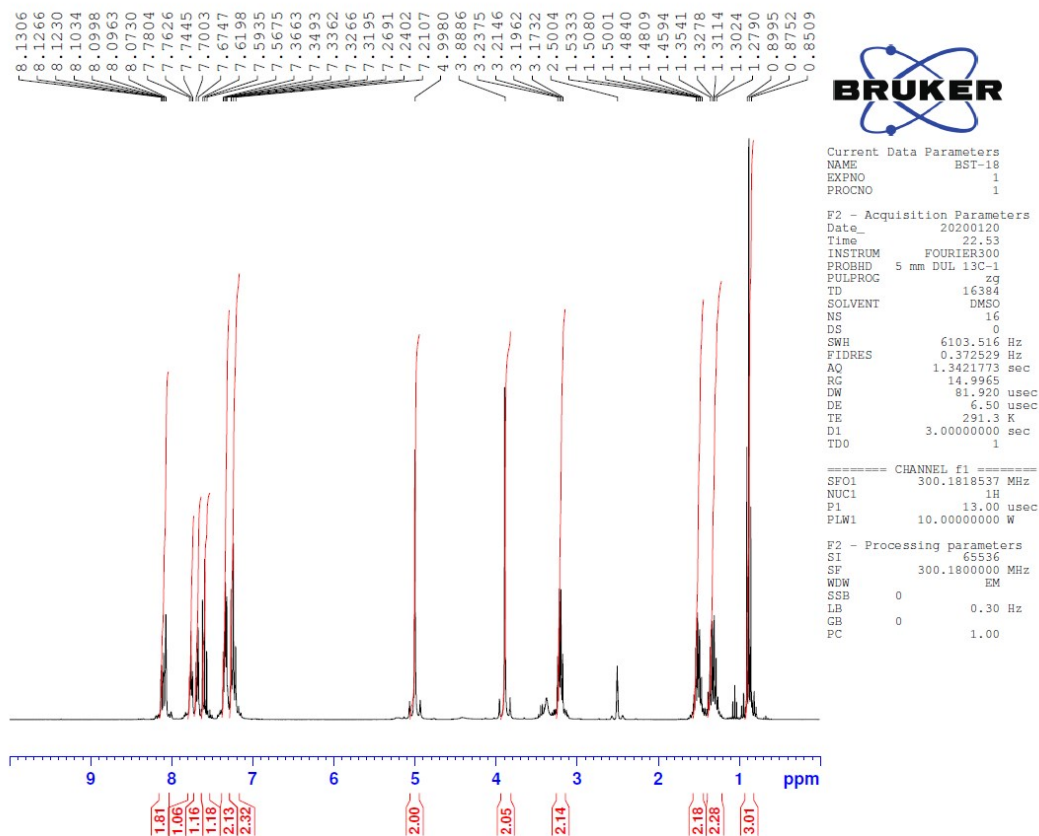

Figure S16. <sup>1</sup>H NMR spectrum of compound **6f**.

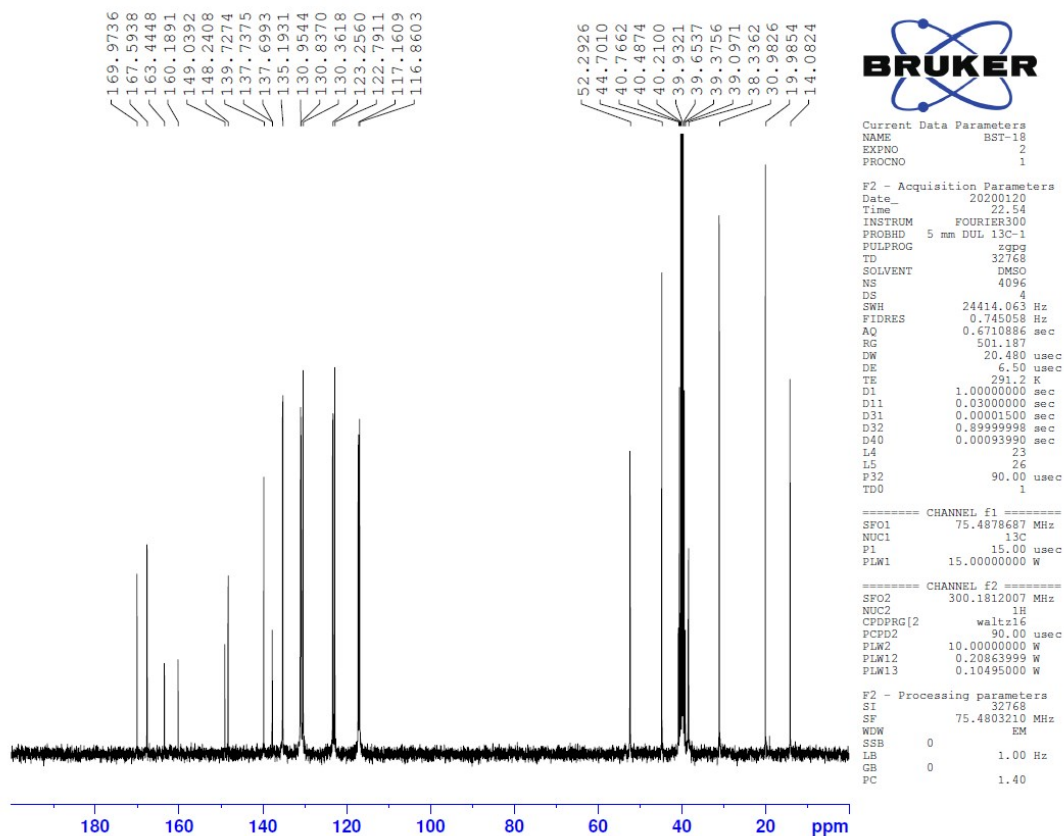

Figure S17. <sup>13</sup>C NMR spectrum of compound **6f**.

Data File: C:\LabSolutions\Data\Analiz\uo\BST-18\_11.lcd

| Elmt | Val. | Min | Max | Use Adduct |
|------|------|-----|-----|------|------|-----|-----|------|------|-----|-----|------|------|-----|-----|------------|
| H    | 1    | 6   | 30  | O    | 2    | 3   | 4   | S    | 2    | 2   | 3   | Ru   | 2    | 0   | 0   | H          |
| C    | 4    | 8   | 30  | F    | 1    | 0   | 1   | Cl   | 1    | 0   | 0   | Pd   | 2    | 0   | 0   |            |
| N    | 3    | 4   | 5   | P    | 3    | 0   | 0   | Br   | 1    | 0   | 0   | I    | 3    | 0   | 0   |            |

Error Margin (ppm): 5  
 HC Ratio: unlimited  
 Max Isotopes: 3  
 MSn Iso RI (%): 10.00

DBE Range: 7.0 - 16.0  
 Apply N Rule: no  
 Isotope RI (%): 1.00  
 MSn Logic Mode: AND

Electron Ions: both  
 Use MSn Info: yes  
 Isotope Res: 9000  
 Max Results: 100

Event#: 1 MS(E+) Ret. Time : 3.160 -&gt; 3.493 Scan#: 475 -&gt; 525

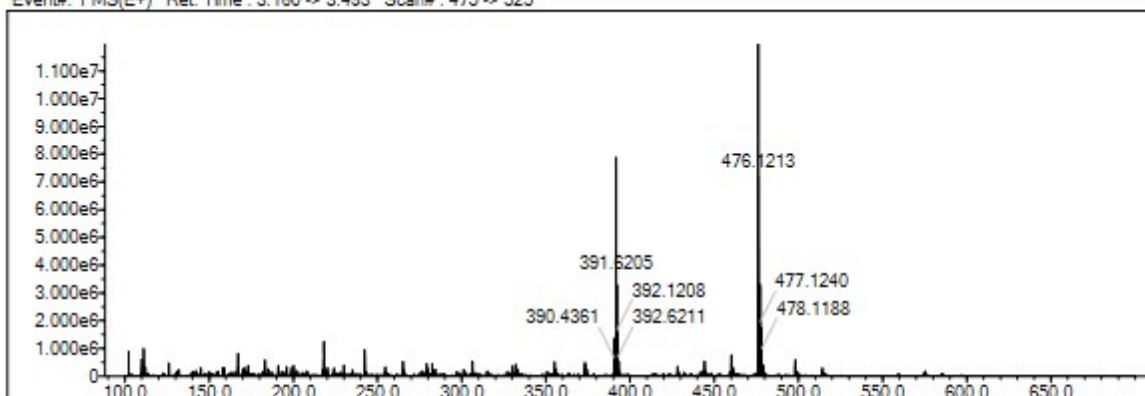

Measured region for 476.1213 m/z

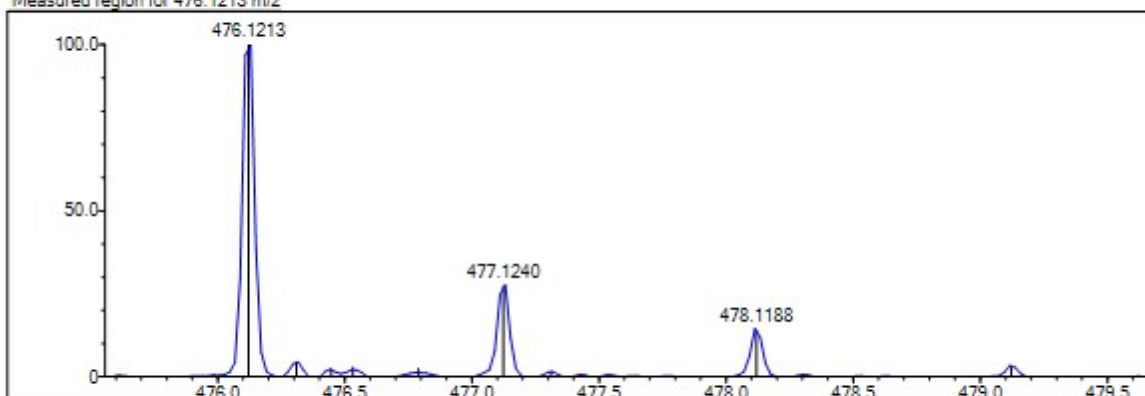C21 H22 N5 O3 F S2 [M+H]<sup>+</sup>: Predicted region for 476.1221 m/z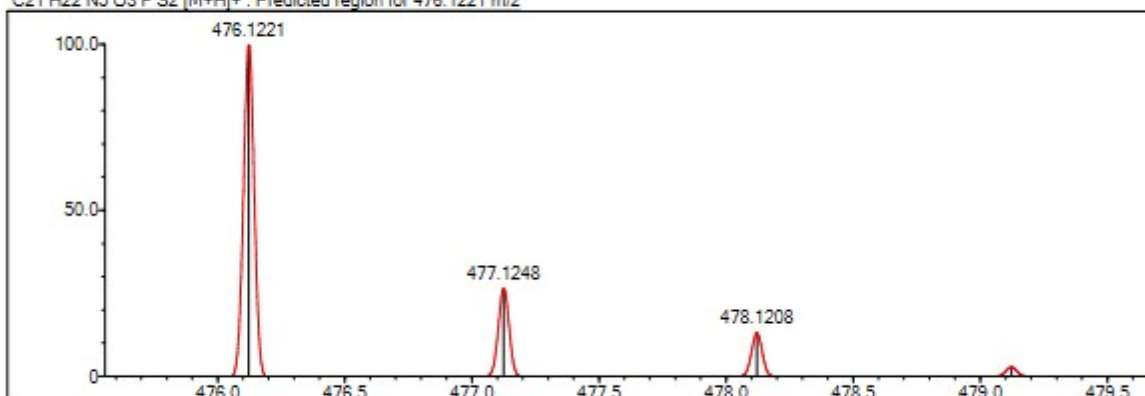

| Rank | Score | Formula (M)        | Ion                | Meas. m/z | Pred. m/z | Df. (mDa) | Df. (ppm) | Iso    | DBE  |
|------|-------|--------------------|--------------------|-----------|-----------|-----------|-----------|--------|------|
| 1    | 98.30 | C21 H22 N5 O3 F S2 | [M+H] <sup>+</sup> | 476.1213  | 476.1221  | -0.8      | -1.68     | 100.00 | 13.0 |

Figure S18. Mass spectrum of compound 6f.

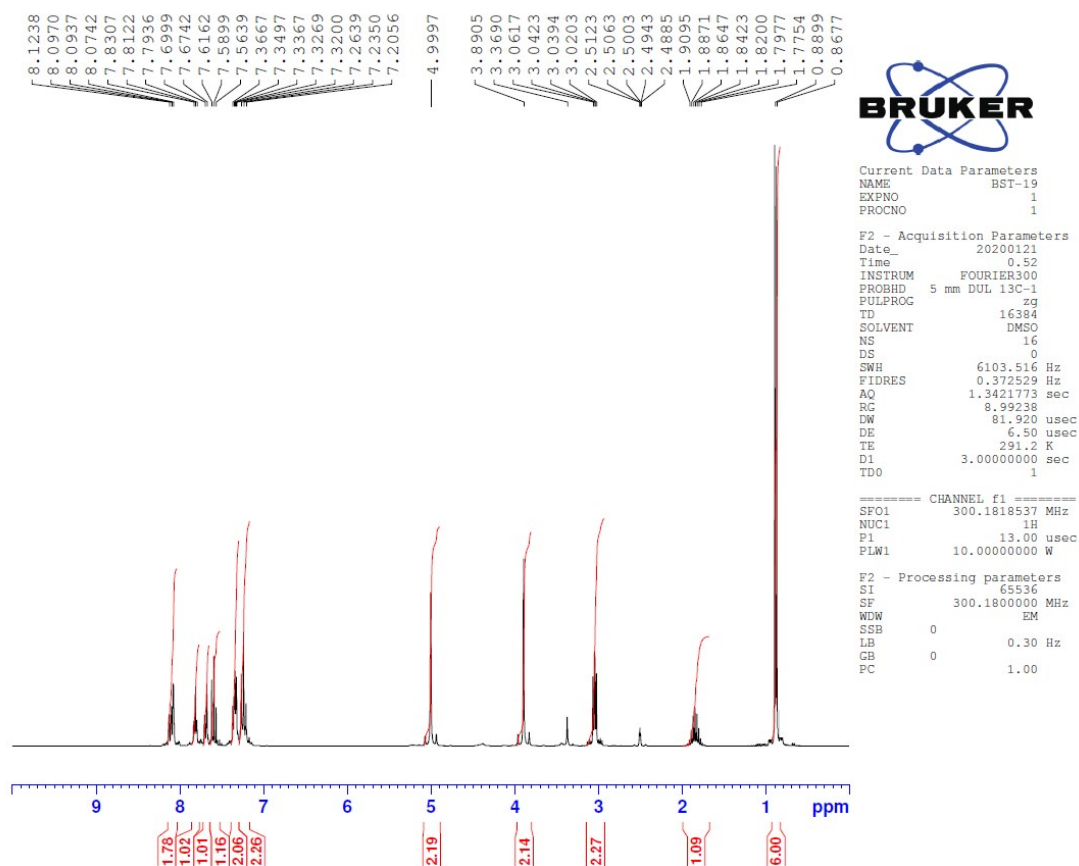

Figure S19.  $^1\text{H}$  NMR spectrum of compound **6g**.

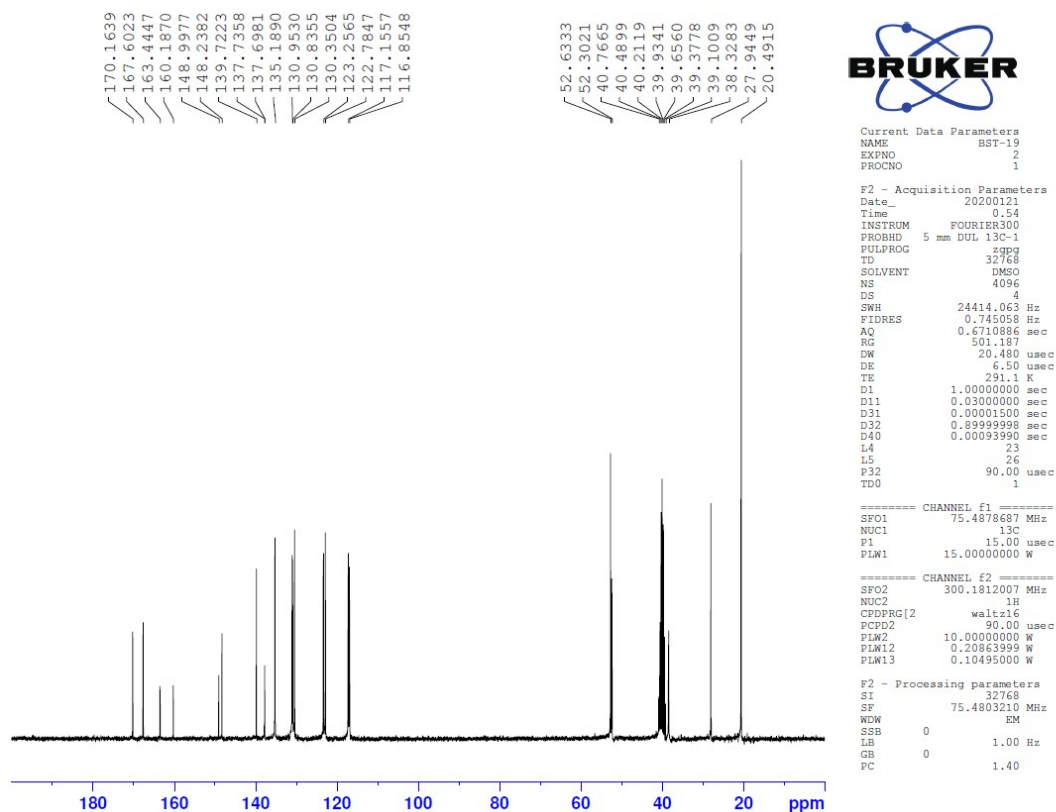

Figure S20.  $^{13}\text{C}$  NMR spectrum of compound **6g**.

Data File: C:\LabSolutions\Data\Analiz\luc\BST-19\_12.lcd

| Elmt | Val. | Min | Max | Use Adduct |
|------|------|-----|-----|------|------|-----|-----|------|------|-----|-----|------|------|-----|-----|------------|
| H    | 1    | 6   | 30  | O    | 2    | 3   | 4   | S    | 2    | 2   | 3   | Ru   | 2    | 0   | 0   | H          |
| C    | 4    | 8   | 30  | F    | 1    | 0   | 1   | Cl   | 1    | 0   | 0   | Pd   | 2    | 0   | 0   |            |
| N    | 3    | 4   | 5   | P    | 3    | 0   | 0   | Br   | 1    | 0   | 0   | I    | 3    | 0   | 0   |            |

Error Margin (ppm): 5  
 HC Ratio: unlimited  
 Max Isotopes: 3  
 MSn Iso RI (%): 10.00

DBE Range: 7.0 - 16.0  
 Apply N Rule: no  
 Isotope RI (%): 1.00  
 MSn Logic Mode: AND

Electron Ions: both  
 Use MSn Info: yes  
 Isotope Res: 9000  
 Max Results: 100

Event#: 1 MS(E+) Ret. Time : 2.933 -> 3.333 Scan#: 441 -> 501

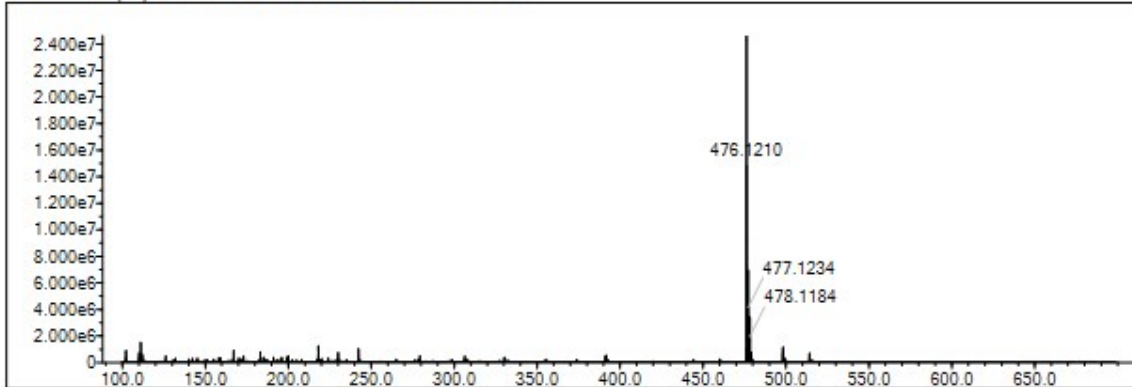

Measured region for 476.1210 m/z

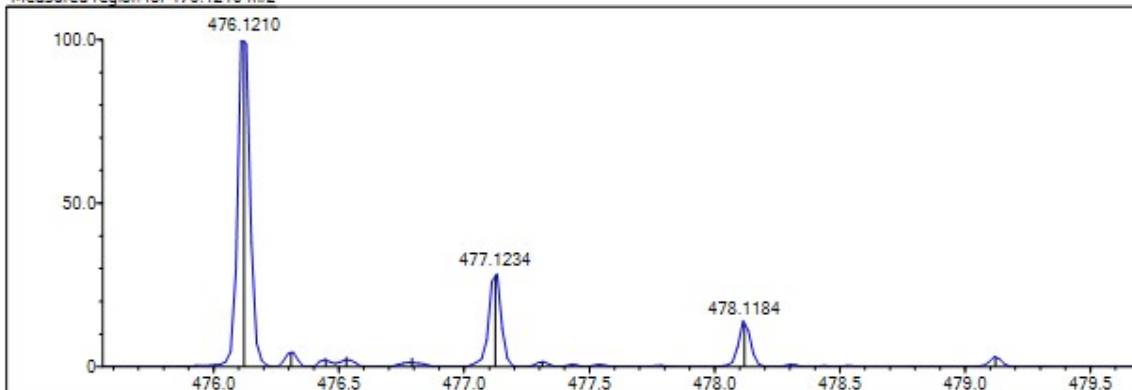

C21 H22 N5 O3 F S2 [M+H]+ : Predicted region for 476.1221 m/z

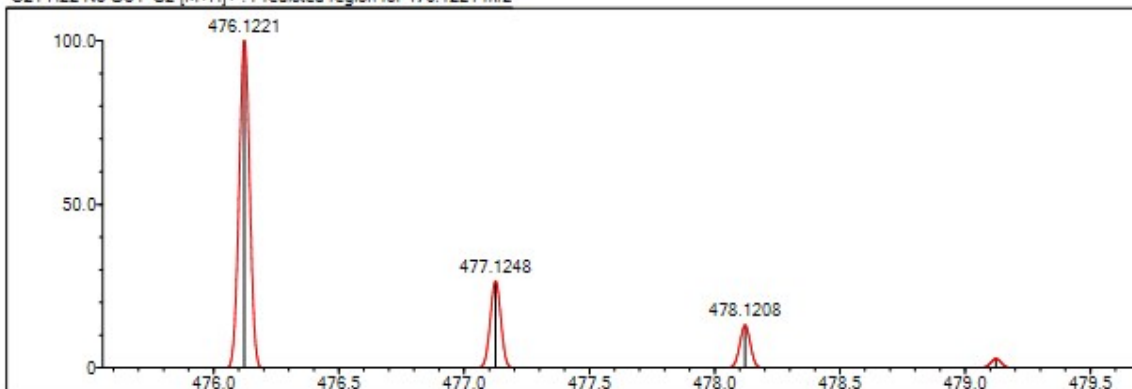

| Rank | Score | Formula (M)        | Ion                | Meas. m/z | Pred. m/z | Df. (mDa) | Df. (ppm) | Iso    | DBE  |
|------|-------|--------------------|--------------------|-----------|-----------|-----------|-----------|--------|------|
| 1    | 96.72 | C21 H22 N5 O3 F S2 | [M+H] <sup>+</sup> | 476.1210  | 476.1221  | -1.1      | -2.31     | 100.00 | 13.0 |

Figure S21. Mass spectrum of compound 6g.

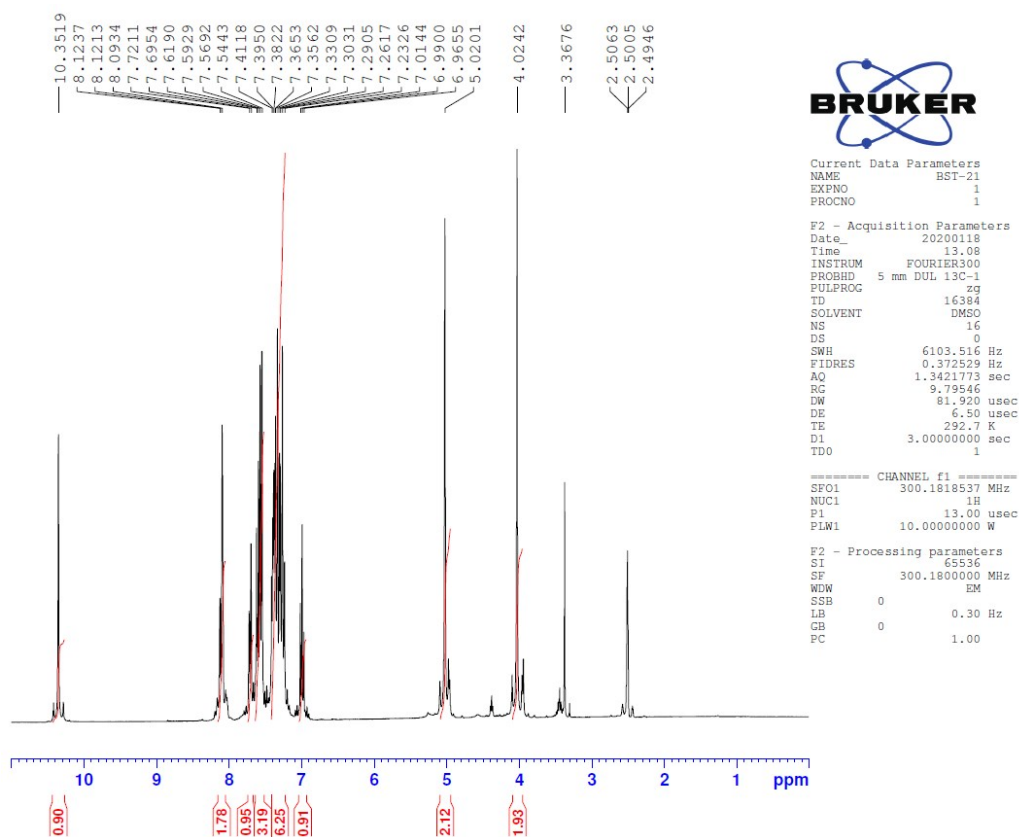

Figure S22. <sup>1</sup>H NMR spectrum of compound 6h.

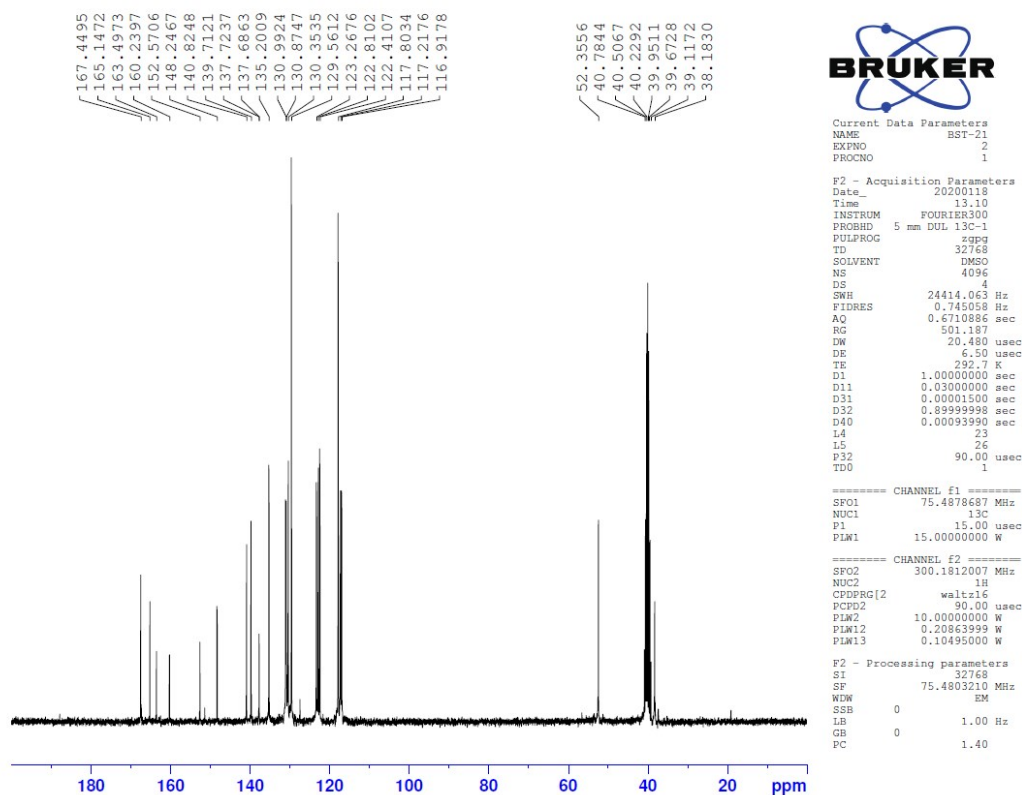

Figure S23. <sup>13</sup>C NMR spectrum of compound 6h.



Data File: C:\LabSolutions\Data\Analiz\usc\BST-21\_13.lcd

| Elmt | Val. | Min | Max | Use Adduct |
|------|------|-----|-----|------|------|-----|-----|------|------|-----|-----|------|------|-----|-----|------------|
| H    | 1    | 6   | 30  | O    | 2    | 3   | 4   | S    | 2    | 2   | 3   | Ru   | 2    | 0   | 0   | H          |
| C    | 4    | 8   | 30  | F    | 1    | 0   | 1   | Cl   | 1    | 0   | 0   | Pd   | 2    | 0   | 0   |            |
| N    | 3    | 4   | 5   | P    | 3    | 0   | 0   | Br   | 1    | 0   | 0   | I    | 3    | 0   | 0   |            |

Error Margin (ppm): 5  
 HC Ratio: unlimited  
 Max Isotopes: 3  
 MSn Iso RI (%): 10.00

DBE Range: 7.0 - 20.0  
 Apply N Rule: yes  
 Isotope RI (%): 1.00  
 MSn Logic Mode: AND

Electron Ions: both  
 Use MSn Info: yes  
 Isotope Res: 9000  
 Max Results: 100

Event#: 1 MS(E+) Ret. Time : 3.040 Scan#: 457

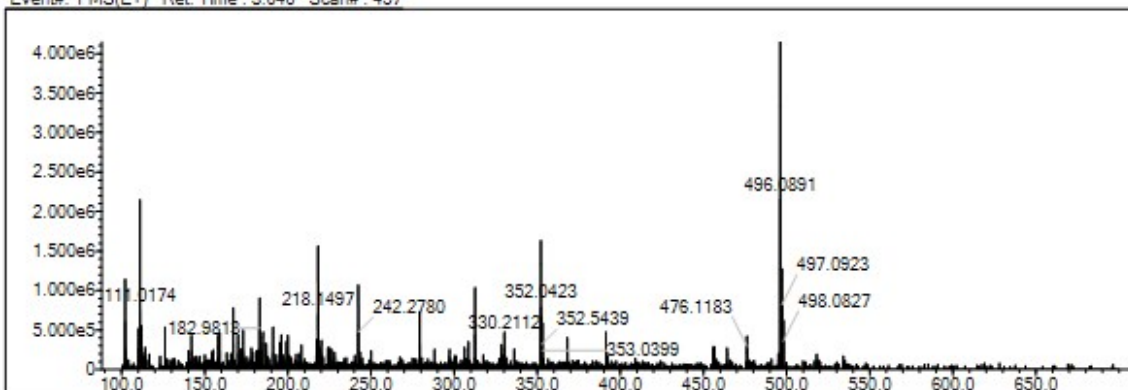

Measured region for 496.0891 m/z

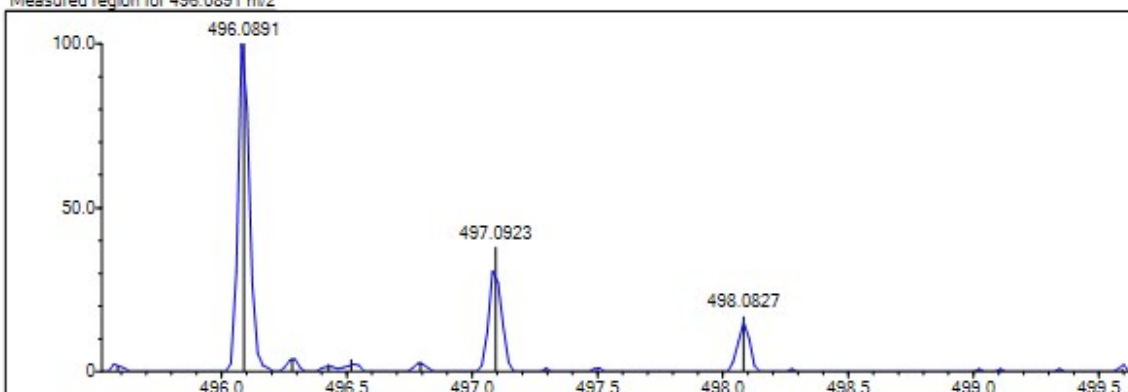C23 H18 N5 O3 F S2 [M+H]<sup>+</sup> : Predicted region for 496.0908 m/z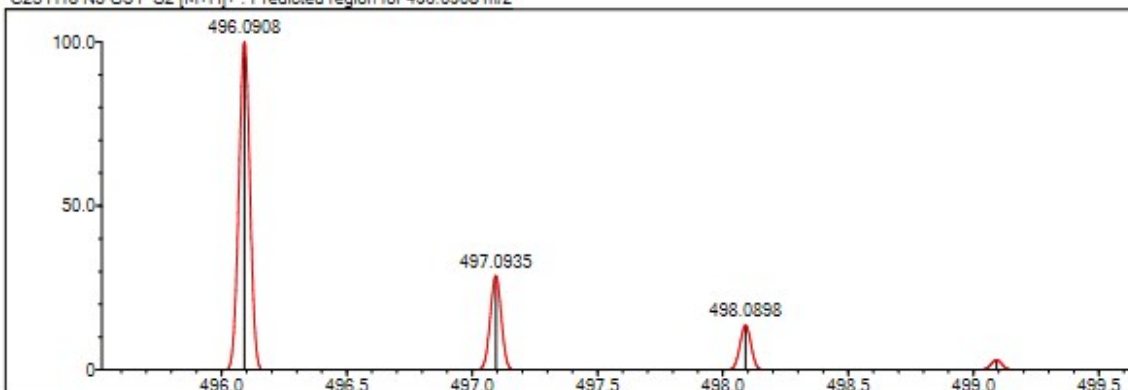

| Rank | Score | Formula (M)        | Ion                | Meas. m/z | Pred. m/z | Df. (mDa) | Df. (ppm) | Iso   | DBE  |
|------|-------|--------------------|--------------------|-----------|-----------|-----------|-----------|-------|------|
| 1    | 48.35 | C23 H18 N5 O3 F S2 | [M+H] <sup>+</sup> | 496.0891  | 496.0908  | -1.7      | -3.43     | 51.48 | 17.0 |

Figure S24. Mass spectrum of compound 6h.

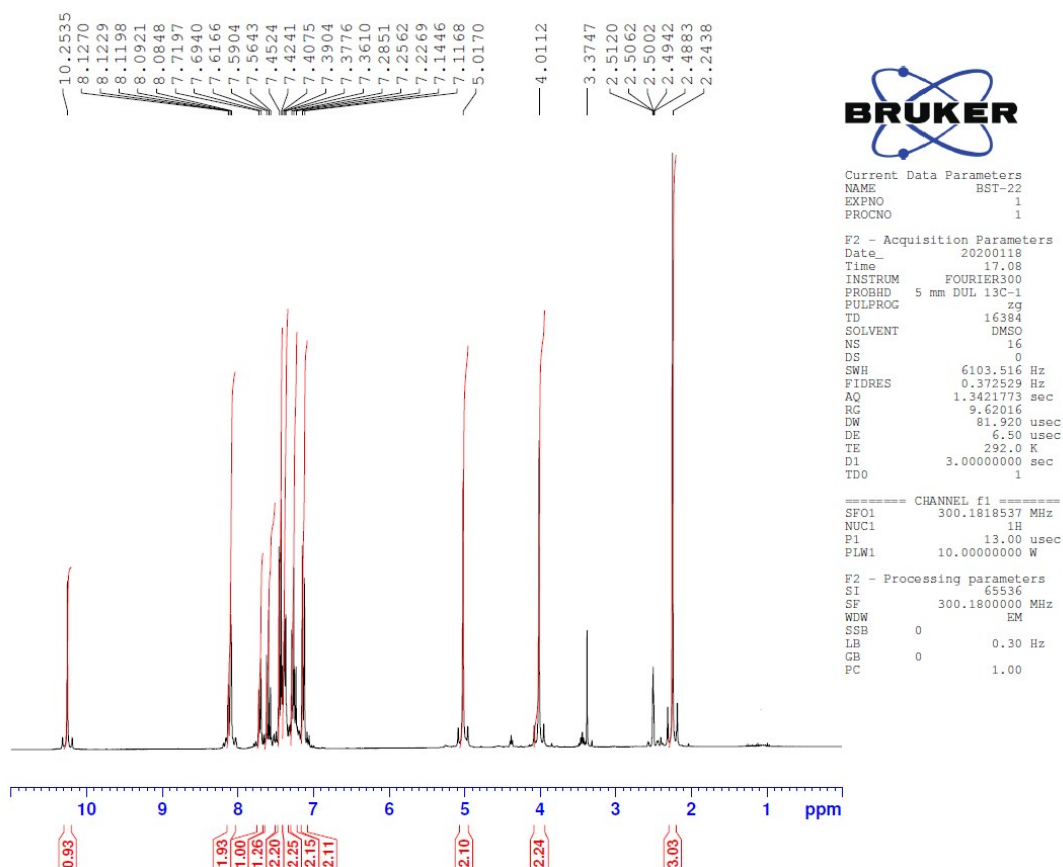

Figure S25. <sup>1</sup>H NMR spectrum of compound **6i**.

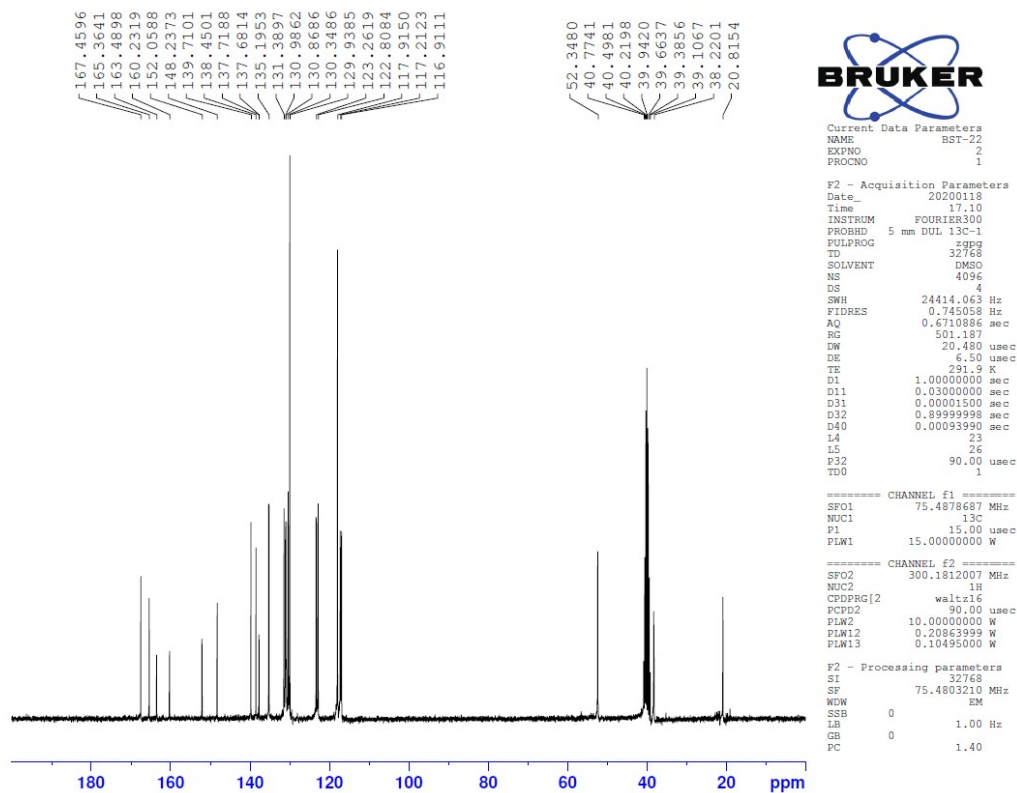

Figure S26. <sup>13</sup>C NMR spectrum of compound **6i**.

Data File: C:\LabSolutions\Data\Analiz\luc\BST-22\_14.lcd

| Elmt | Val. | Min | Max | Use Adduct |
|------|------|-----|-----|------|------|-----|-----|------|------|-----|-----|------|------|-----|-----|------------|
| H    | 1    | 6   | 30  | O    | 2    | 3   | 4   | S    | 2    | 2   | 3   | Ru   | 2    | 0   | 0   | H          |
| C    | 4    | 8   | 30  | F    | 1    | 0   | 1   | Cl   | 1    | 0   | 0   | Pd   | 2    | 0   | 0   |            |
| N    | 3    | 4   | 5   | P    | 3    | 0   | 0   | Br   | 1    | 0   | 0   | I    | 3    | 0   | 0   |            |

Error Margin (ppm): 5  
 HC Ratio: unlimited  
 Max Isotopes: 3  
 MSn Iso RI (%): 10.00

DBE Range: 7.0 - 20.0  
 Apply N Rule: yes  
 Isotope RI (%): 1.00  
 MSn Logic Mode: AND

Electron Ions: both  
 Use MSn Info: yes  
 Isotope Res: 9000  
 Max Results: 100

Event#: 1 MS(E+) Ret. Time : 3.080 -> 3.360 Scan#: 463 -> 505

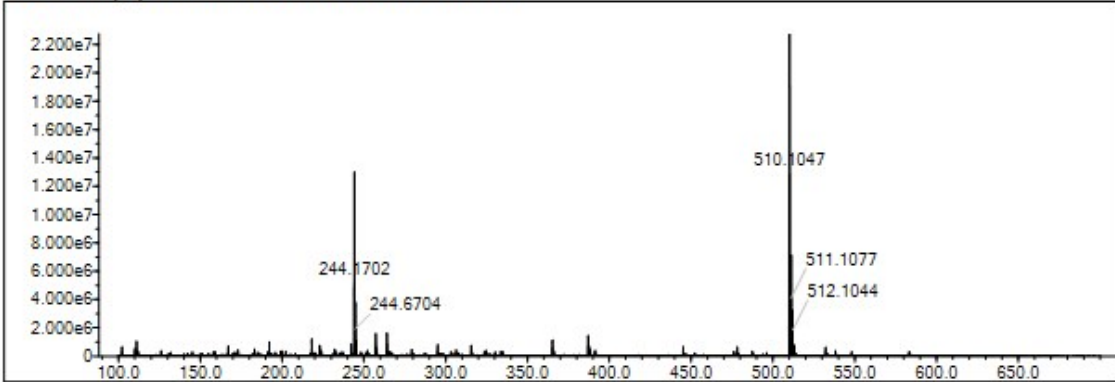

Measured region for 510.1047 m/z

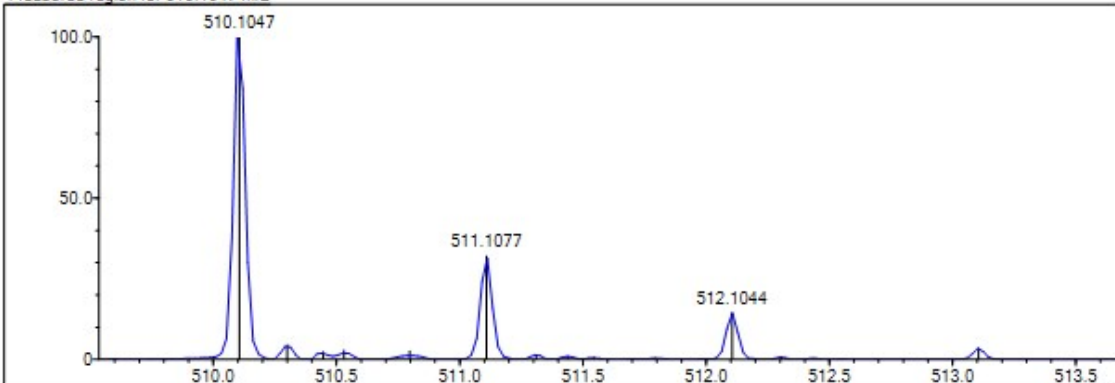

C24 H20 N5 O3 F S2 [M+H]<sup>+</sup> : Predicted region for 510.1064 m/z

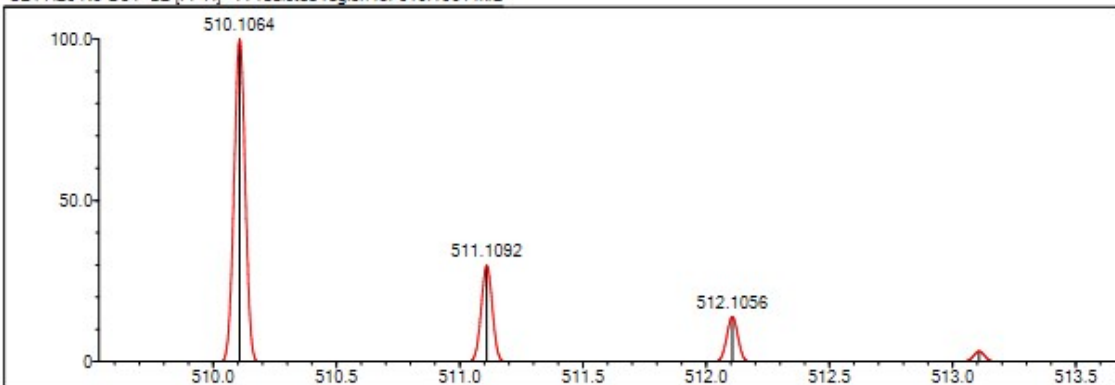

| Rank | Score | Formula (M)        | Ion                | Meas. m/z | Pred. m/z | Df. (mDa) | Df. (ppm) | Iso   | DBE  |
|------|-------|--------------------|--------------------|-----------|-----------|-----------|-----------|-------|------|
| 1    | 82.62 | C24 H20 N5 O3 F S2 | [M+H] <sup>+</sup> | 510.1047  | 510.1064  | -1.7      | -3.33     | 87.73 | 17.0 |

Figure S27. Mass spectrum of compound 6i.
